RESEARCH ARTICLE

# The Effect of Preoperative Oral Carbohydrate or Oral Rehydration Solution on Postoperative Quality of Recovery: A Randomized, Controlled Clinical Trial

Ayako Asakura<sup>1\*</sup>, Takahiro Mihara<sup>1,2</sup>, Takahisa Goto<sup>1</sup>

**1** Department of Anesthesiology and Critical Care Medicine, Yokohama City University Graduate School of Medicine, Yokohama, Japan, **2** Department of Anesthesiology, Kanagawa Children's Medical Center, Yokohama, Japan

\* [aauaaao@gmail.com](mailto:aauaaao@gmail.com)

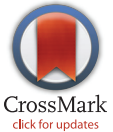

**OPEN ACCESS**

**Citation:** Asakura A, Mihara T, Goto T (2015) The Effect of Preoperative Oral Carbohydrate or Oral Rehydration Solution on Postoperative Quality of Recovery: A Randomized, Controlled Clinical Trial. PLoS ONE 10(8): e0133309. doi:10.1371/journal.pone.0133309

**Editor:** Wan Yee Joseph Lau, The Chinese University of Hong Kong, HONG KONG

**Received:** April 30, 2015

**Accepted:** June 25, 2015

**Published:** August 28, 2015

**Copyright:** © 2015 Asakura et al. This is an open access article distributed under the terms of the [Creative Commons Attribution License](https://creativecommons.org/licenses/by/4.0/), which permits unrestricted use, distribution, and reproduction in any medium, provided the original author and source are credited.

**Data Availability Statement:** All relevant data are within the paper and its Supporting Information files.

**Funding:** The authors have no support or funding to report.

**Competing Interests:** The authors have declared that no competing interests exist.

## Abstract

### Background

Numerous studies have demonstrated the beneficial effects of preoperative administration of oral carbohydrate (CHO) or oral rehydration solution (ORS). However, the effects of preoperative CHO or ORS on postoperative quality of recovery after anesthesia remain unclear. Consequently, the purpose of the current study was to evaluate the effect of preoperative CHO or ORS on patient recovery, using the Quality of Recovery 40 questionnaire (QoR-40).

### Methods

This prospective, randomized, controlled clinical trial included American Society of Anesthesiologists (ASA) physical status 1 and 2 adult patients, who were scheduled to undergo a surgical procedure of body surface. Subjects were randomized to one of the three groups: 1) preoperative CHO group, 2) preoperative ORS group, and 3) control group. The primary outcome was the global QoR-40 administered 24 h after surgery. Intraoperative use of vasopressor, intraoperative body temperature changes, and postoperative nausea and vomiting (PONV) were also evaluated.

### Results

We studied 134 subjects. The median [interquartile range (IQR)] global QoR-40 scores 24 h after the surgery were 187 [177–197], 186 [171–200], and 184 [171–198] for the CHO, ORS, and control groups, respectively ( $p = 0.916$ ). No significant differences existed between the groups regarding intraoperative vasopressor use during the surgery ( $p = 0.475$ ).

### Conclusions

Results of the current study indicated that the preoperative administration of either CHO or ORS did not improve the quality of recovery in patients undergoing minimally invasive body surface surgery.

## Trial Registration

[www.umin.ac.jp](http://www.umin.ac.jp) UMIN000009388 <https://upload.umin.ac.jp/cgi-open-bin/ctr/ctr.cgi?function=brows&action=brows&type=summary&recptno=R000011029&language=E>

## Introduction

Enhanced postoperative recovery programs have become widely accepted, and allowing the unrestricted intake of clear liquids until 2 h before anesthesia has been adopted as a standard practice [1].

A number of prior studies have examined the effects of preoperative administration of oral carbohydrate (CHO), and have resulted in reports of beneficial effects of CHO on postoperative insulin resistance [2,3], muscle function [4], gut function [5], immunodepression [6], and preoperative discomfort [7]. As well, some prior research emphasized the supplementation of fluid and electrolytes through the administration of preoperative oral rehydration solution (ORS) [8]. However, the effects of CHO or ORS administration on important clinical endpoints such as postoperative quality of recovery (QoR) following anesthesia remain uncertain [9,10]. Additionally, no prior research has endeavored to compare the effects of preoperative CHO or ORS on postoperative QoR. Accordingly, we considered it important to clarify whether CHO or ORS affected postoperative QoR, which solution was easier to apply in clinical practice, and which would be beneficial for a large number of patients.

As we considered that in invasive surgery the stress response from the surgical trauma is too large to clarify the effects of preoperative administration, we decided to assess the effects in minor surgery.

The aim of the current study was to investigate the effects of preoperative administration of CHO or ORS on patient recovery from minor surgery by using the Quality of Recovery 40 (QoR-40) questionnaire.

## Materials and Methods

### Study Subjects

The study was a prospective, controlled, parallel-group clinical trial with equal randomization conducted at the Yokohama City University Hospital in Yokohama, Japan. The study was approved by the Ethics Committee of Yokohama City University Hospital on December 1<sup>st</sup>, 2011 with approved number B111110025, and written informed consent was obtained from all study participants. The patients were recruited from January 5<sup>th</sup>, 2012 to March 21<sup>st</sup>, 2013, and were followed-up from January 5<sup>th</sup>, 2012 to March 23<sup>rd</sup>, 2013. The clinical trial registration for this study can be found at [www.umin.ac.jp](http://www.umin.ac.jp) under registration number UMIN000009388. There was a delay in registering this study by misunderstanding.

Eligible participants were ASA physical status 1 and 2 adults, age 20 to 79 years, who were scheduled to undergo a surgical procedure of body surface. In the original study protocol, the subjects were patients who were scheduled to undergo a transperineal prostate brachytherapy or lymphaticovenular anastomosis, but were broadened as written above after the Ethics Committee approved our intention of the change. Patients with impaired gastrointestinal motility, poor comprehension of Japanese, or with psychiatric disorders were excluded from enrolment.

Patients were randomly assigned to one of three preoperative treatment groups. Group 1 received 250ml of preoperative CHO (Arginaid Water™, 18% carbohydrates, Nestle Health

Science, Tokyo, Japan) between 6.00–6:30 a.m. on the morning of surgery. This is because 250ml of Arginaid Water are approved as a meal. Group 2 received 1000ml of preoperative ORS (OS-1™, 2.5% carbohydrate, Otsuka Pharmaceutical, Tokushima, Japan) starting 20.00 p.m. on the night before surgery and up to 2 h prior to anesthesia induction. This is based on the volume for rehydrating 12h of dehydration in healthy patients. Group 3 served as the control group, did not receive any preoperative CHO or ORS, and were fasted starting at midnight on the day of surgical procedure. The composition of the test solutions are detailed in Table 1 and as previously mentioned, the amount were selected based on clinical use.

Randomization of the study participants was performed after written informed consent was obtained from the study participants, by a lottery method using sealed opaque lot. Although patients and anesthesiologists were not blinded to the patient’s group allocation, a data analyst was blinded.

### Anesthesia and surgical management

None of the study subjects received any premedication. Fentanyl 1–2 µg kg<sup>-1</sup> and propofol 1–2 mg kg<sup>-1</sup> were administered for inducing anesthesia. Rocuronium 0.6 mg kg<sup>-1</sup> was administered to facilitate tracheal intubation or laryngeal mask airway insertion. Anesthesia maintenance was achieved using end-tidal sevoflurane 1.0–1.5% and remifentanyl 0.05–0.20 µg kg<sup>-1</sup> min<sup>-1</sup>, titrated to keep the mean blood pressure within 20% of the baseline. Additional fentanyl and rocuronium were administered during the procedure, if necessary. During maintenance, the patients received a mixture of air and oxygen (O<sub>2</sub>) to keep F<sub>I</sub>O<sub>2</sub> between 0.4 and 0.6. The patients received 50 mg flurbiprofen 15 min before the end of the procedure, if needed. Neuro-muscular blocks were reversed by the administration of neostigmine and atropine.

All surgical procedures performed were minimally invasive and were associated with either no postoperative pain or pain that was easily managed by administration of non-steroidal anti-inflammatory drugs (NSAIDs).

### Data Collection

Twenty-four hours after the conclusion of the surgical procedure, the subjects were asked to complete the Japanese version of QoR-40 questionnaire [11]. The QoR-40 is a global measure of quality of recovery that incorporates five dimensions of health including patient support,

**Table 1. Composition of Each Test Fluid.**

|                     | CHO (Arginaid Water) | ORS (OS-1) |
|---------------------|----------------------|------------|
| Energy (kcal/ml)    | 0.8                  | 0.1        |
| Carbohydrate (%)    | 18                   | 2.5        |
| Glucose (%)         |                      | 1.8        |
| Sodium (mEq/L)      | 0                    | 50         |
| Potassium (mEq/L)   | –                    | 20         |
| Magnesium (mEq/L)   | –                    | 2          |
| Lactate (mEq/L)     | –                    | 31         |
| Chloride (mEq/L)    | –                    | 50         |
| Phosphorus (mEq/L)  | 0.18                 | 2          |
| Zinc (%)            | 0.008                | –          |
| Copper (%)          | 0.0008               | –          |
| L-Arginine (%)      | 2                    | –          |
| Osmolality (mOsm/L) | 545                  | 270        |

doi:10.1371/journal.pone.0133309.t001

comfort, emotions, physical independence, and pain, each graded on a 5-point Likert scale. The QoR-40 scores range from 40 (extremely poor quality of recovery) to 200 (excellent quality of recovery). Additional perioperative data collected included the subject's age, height, weight, ASA physical status, preoperative QoR-40 scores, duration of the anaesthesia, total intravenous (IV) fluids delivered, incidence of aspiration, intraoperative use of a vasopressor, intraoperative changes in body temperature, and postoperative nausea and vomiting (PONV). 36-Item Short-Form Health Survey (SF-36™) of 1 and 3 months after the surgery were also planned in the original protocol to evaluate the postoperative quality of life, but we decided to specialize only in the postoperative quality of recovery, so only the QoR-40 questionnaire were used.

## Statistical Analysis

The primary outcome of the study was the global QoR-40 score. A sample size of 42 per group was estimated to achieve 80% power with a significance level of 0.05 to detect a 10-point difference in the aggregated QoR-40 score for the 3 study groups to be compared assuming an overall standard deviation of 14, similar to what was observed in a previous investigation [12]. A 10-point difference represents a clinically relevant improvement in quality of recovery based on previously reported values on the mean and range of the QoR-40 score in patients after anaesthesia and surgery [13]. To account for the loss of some study participants, 150 subjects were recruited. The sample size calculation was made using the R statistical software package version 2.13.0 (R Foundation for Statistical Computing, Vienna, Austria). In the original protocol, 250 subjects were planned based on the previous study [7], however following the result of calculation, 150 subjects were recruited.

The analyses were performed on data from the intention-to-treat population, defined as all randomly assigned patients except for those who had no complete QoR-40. In the per-protocol analyses, patients with one or more major protocol violations were excluded.

The Kolmogorov-Smirnov test was used to test the hypothesis of normal distribution. Normally distributed data were reported as mean  $\pm$  [standard deviation (SD)] and were analyzed using one-way analysis of variance (ANOVA). Non-normally distributed data are reported as median [interquartile range (IQR)] and were analyzed using the Kruskal-Wallis test. When there was a significant difference, a post hoc analysis with Bonferroni correction was planned to be performed, however with no significant differences in Kruskal-Wallis test, we did not perform the paired comparison. Categorical variables were compared using the Fisher's exact test. All statistical analyses were performed using the modified R software programs version 1.11 [14], and  $p$ -values of  $<0.050$  were considered statistically significant.

## Results

The details of the conduct of the study are shown in Fig 1. Out of the 150 subjects originally enrolled and randomized into treatment groups, 134 subjects completed the study. Sixteen patients were lost to follow-up: three patients failed to complete the questionnaire, and for the remaining 13 patients, we were unable to collect the questionnaire. We could not find any statistically significant differences among the groups in the patients' baseline characteristics, pre-existing medical conditions, and surgical factors (Table 2). In the current study, two-thirds of the surgical cases involved patients undergoing transperineal prostate brachytherapy, which resulted in a patient population comprising 70% men (Table 2).

The median (IQR) of the global QoR-40 scores 24 h after surgery were 187 (177–197), 186 (171–200), and 184 (171–198) for the CHO, ORS, and control groups, respectively (Fig 2). Further, no statistical and clinical differences ( $p = 0.916$ ) were detected between the global QoR-40

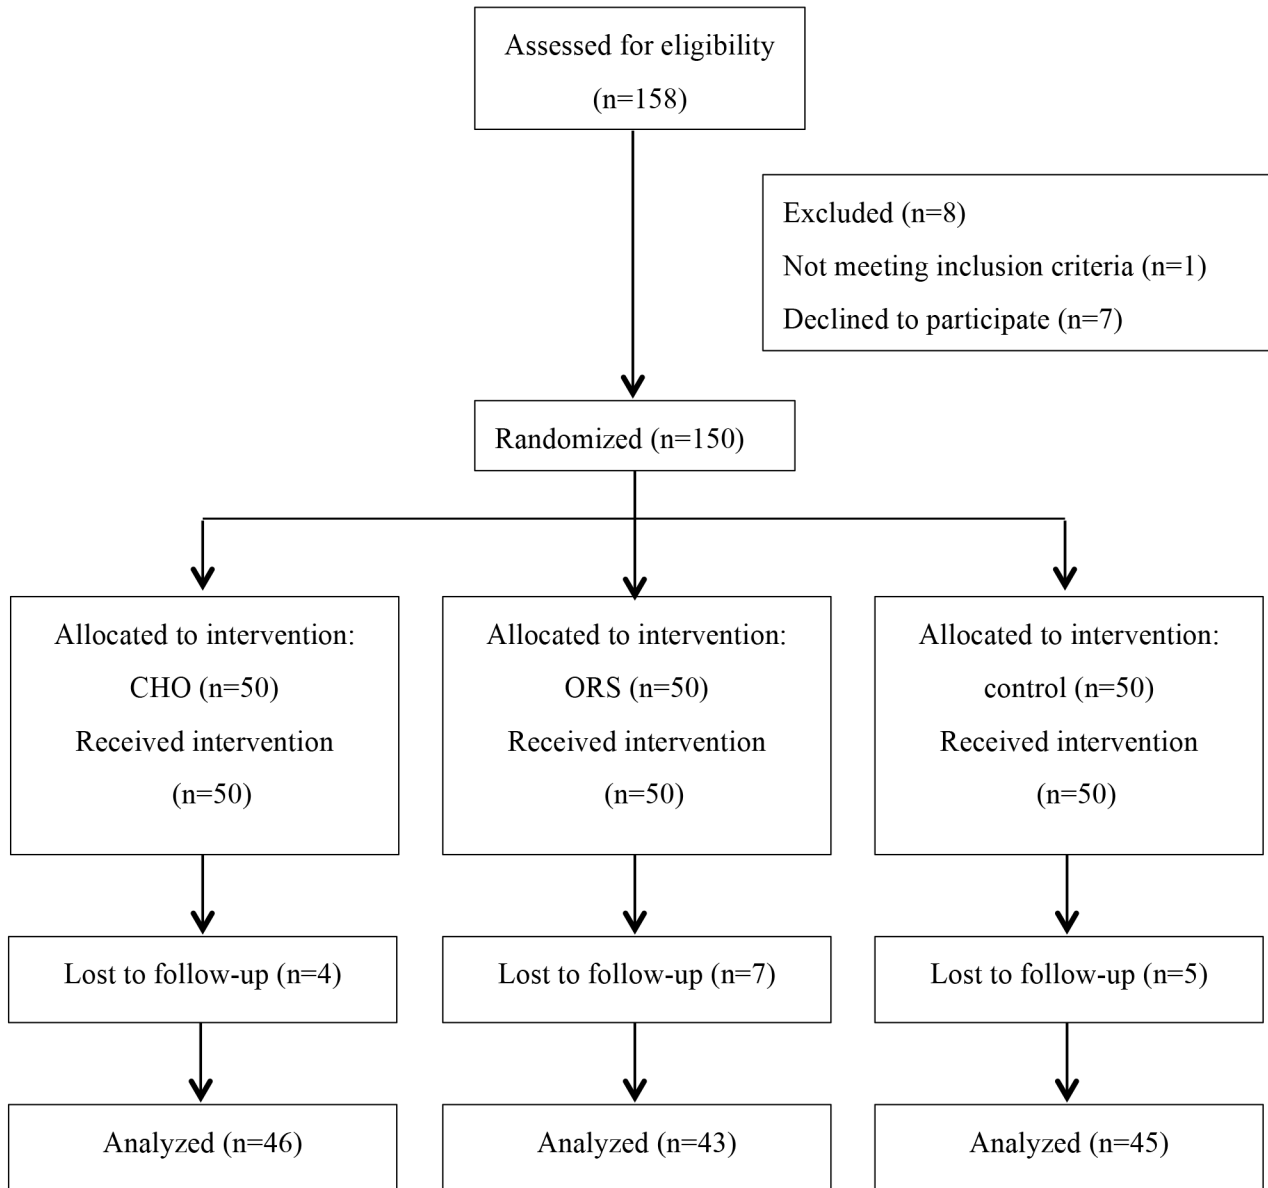

**Fig 1. Consort flow study diagram.**

doi:10.1371/journal.pone.0133309.g001

scores from the different treatment groups (Table 3). Likewise, there were no differences in each dimensions of the QoR-40 (Table 3).

One patient from the CHO group and six patients from the ORS group were not able to drink the prescribed amount of solution preoperatively. In addition, dexamethasone and/or droperidol had to be administered to three patients from the CHO group, three patients from the ORS group, and one patient from the control group, who complained of nausea or vomiting in the operating room. Accordingly, in the per-protocol analyses, data from these patients ( $n = 7$ ) were excluded. The median (IQR) global QoR-40 scores were 187.5 (175.5–195), 188 (165.75–196), and 184.5 (168.75–196) for the CHO, ORS, and control groups, respectively. The results had no significant difference with the intention-to-treat analyses, and showed no statistical and clinical difference ( $p = 0.831$ ).

**Table 2. Subjects characteristics and clinical details.** Data presented as mean ± SD, median (interquartile range), or number (%).

|                               | CHO (n = 46)    | ORS (n = 43)    | Control (n = 45) | p value |
|-------------------------------|-----------------|-----------------|------------------|---------|
| Age (yr)                      | 63.4 ± 13.6     | 64.4 ± 9.7      | 64.5 ± 10.4      | 0.877   |
| Sex                           |                 |                 |                  | 0.891   |
| M                             | 31 (67)         | 31 (72)         | 32 (71)          |         |
| F                             | 15 (33)         | 12 (28)         | 13 (29)          |         |
| Height (m)                    | 1.62 ± 0.06     | 1.63 ± 0.08     | 1.63 ± 0.07      | 0.456   |
| Weight (kg)                   | 61.2 ± 9.3      | 64.1 ± 8.9      | 62.9 ± 10.1      | 0.345   |
| ASA physical                  |                 |                 |                  | 0.037   |
| I                             | 17 (37)         | 7 (16)          | 16 (36)          |         |
| II                            | 29 (63)         | 36 (84)         | 29 (64)          |         |
| Duration of anesthesia (min)  | 142 (120–170)   | 150 (121–218)   | 137 (118–309)    | 0.804   |
| Duration of surgery (min)     | 59.5 (39.3–113) | 64.0 (49.5–144) | 59.0 (43.0–140)  | 0.764   |
| Intravenous infusion (ml)     | 800 (600–1000)  | 800 (700–1100)  | 800 (675–1275)   | 0.740   |
| Type of surgery               |                 |                 |                  | 0.736   |
| Urological                    | 29 (63)         | 27 (63)         | 31 (69)          |         |
| Gynecological                 | 5 (11)          | 2 (4.6)         | 1 (2.2)          |         |
| Plastics                      | 8 (17)          | 9 (21)          | 11 (24)          |         |
| ENT                           | 1 (2.2)         | 2 (4.6)         | 1 (2.2)          |         |
| Orthopedics                   | 1 (2.2)         | 2 (4.6)         | 0 (0)            |         |
| General                       | 2 (4.3)         | 1 (2.3)         | 1 (2.2)          |         |
| Length of hospital stay (day) | 3 (2–3)         | 3 (2–3)         | 3 (2–6)          | 0.794   |
| Hypertension                  | 17 (37)         | 16 (37)         | 20 (44)          | 0.557   |
| Diabetes                      | 4 (8.7)         | 5 (12)          | 7 (16)           | 0.600   |
| Smoking history               | 19 (41)         | 23 (54)         | 18 (40)          | 0.382   |
| Global QoR-40 score           | 196 (191–198)   | 195 (185–200)   | 197 (189.5–200)  | 0.655   |

ENT, ear, nose, or throat

doi:10.1371/journal.pone.0133309.t002

The requirement for use of a vasopressor agent (ephedrine or phenylephrine) during the surgery did not differ significantly among the groups both in the intention-to-treat ( $p = 0.475$ ) and per-protocol analyses ( $p = 0.344$ ). Moreover, the incidence of PONV did not differ significantly among the treatment groups in either the intention-to-treat ( $p = 1.000$ ) or per-protocol analyses ( $p = 1.000$ ). (Table 4).

Baseline body temperatures were measured immediately after induction, and the maximum decreases from the baseline, as well as the final temperature changes at the end of surgery relative to the baseline, were assessed. The maximum decreases (IQR) from the baseline were 0.0 (-0.3–0), 0.0(-0.3–0), and -0.1(-0.6–0) in the CHO, ORS, and control groups, respectively ( $p = 0.136$ ) (Fig 3A), while the final temperature changes (IQR) compared to the baseline were 0.1 (-0.1–0.4), 0.2 (0–0.4), and 0.1(-0.2–0.3) in the CHO, ORS, and control groups, respectively ( $p = 0.165$ ) (Fig 3B). In the per-protocol analyses, no significant differences were detected among the groups ( $p = 0.069$  and  $p = 0.158$ ). However, the maximum decreases tended to be smaller in the CHO and ORS groups than in the control group.

## Discussion

The median (IQR) global QoR-40 score 24 h after the surgery indicated that no statistical or clinical differences existed among the preoperative CHO, preoperative ORS, and control

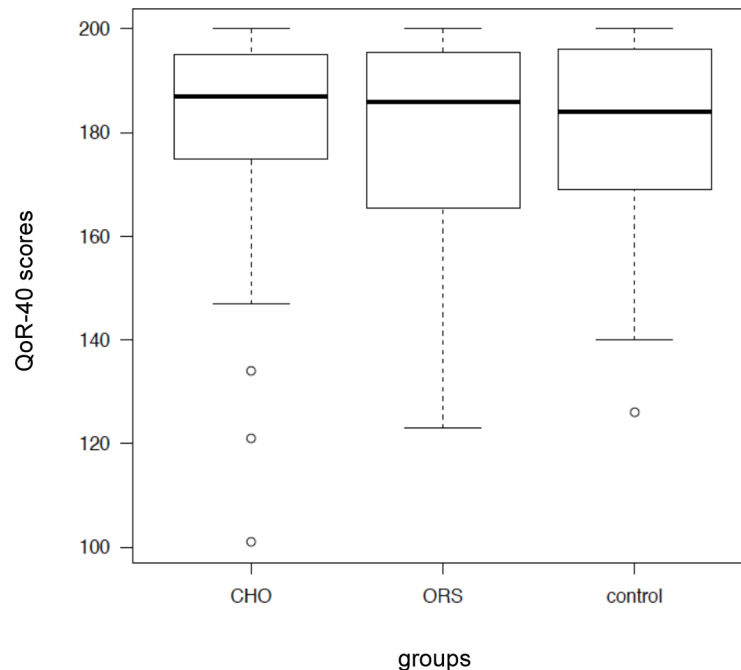

**Fig 2. Box plot of the global QoR-40 scores 24 h after surgery.** Median values shown as solid line within box of 25<sup>th</sup> and 75<sup>th</sup> percentile values. Whiskers represent 10 and 90<sup>th</sup> percentile values. No significant differences were detected among the groups.

doi:10.1371/journal.pone.0133309.g002

groups. Similarly, there were no differences among the groups in the requirement to use a vaso-pressor during surgery. Similarly, there were no differences in temperature changes.

Our sample size was determined to detect a clinically important difference (at least 10) in QoR40 score. Therefore, based on our negative results, we can conclude that in minor surgery, the preoperative intake of either CHO or ORS had no clinically relevant effect on QoR improvement. Two possible explanations for the results of the study could be considered. One explanation is that, the QoR-40 scores in the control group were exceptionally high, which made it difficult to achieve a clinically relevant difference when compared to the QoR-40 scores in the CHO or ORS groups. Results of a systematic review of the QoR-40 indicated that, the mean QoR-40 score for patients without postoperative complications was 170 [15]. However, in this meta-analysis, major surgical procedures such as cardiac surgery, neurosurgery, and general surgery were included. Compared to the prior analyses, the scores we obtained in the control group were much higher, most likely because the surgeries included in our analyses

**Table 3. Global and five-dimensional postoperative quality of recovery scores.** Data presented as median (interquartile range).

|                       | CHO (n = 46)  | ORS (n = 43)  | Control (n = 45) | p value |
|-----------------------|---------------|---------------|------------------|---------|
| QoR-40 dimensions     |               |               |                  |         |
| Emotional state       | 43 (39–45)    | 43 (38–45)    | 42 (38.5–45)     | 0.984   |
| Physical comfort      | 56 (52–59)    | 56 (51–59)    | 56 (48–59)       | 0.822   |
| Patient support       | 35 (33–35)    | 35 (33–35)    | 35 (31–35)       | 0.922   |
| Physical independence | 24 (19–25)    | 23 (16–25)    | 24 (18–25)       | 0.896   |
| Pain                  | 33 (29–34)    | 32 (27–33)    | 32 (29–34)       | 0.486   |
| Global QoR-40         | 187 (175–195) | 186 (165–196) | 184 (168.5–196)  | 0.916   |

doi:10.1371/journal.pone.0133309.t003

**Table 4. Incidence of intraoperative vasopressor use and PONV.** Data presented as number (%).

| ITT                  | CHO (n = 46) | ORS (n = 43) | Control (n = 45) | p value |
|----------------------|--------------|--------------|------------------|---------|
| Required vasopressor | 38 (83)      | 34 (79)      | 40 (89)          | 0.475   |
| PONV                 | 4 (8.7)      | 4 (9.3)      | 4 (8.9)          | 1.000   |
| PP                   | CHO (n = 42) | ORS (n = 34) | Control (n = 44) | p value |
| Required vasopressor | 34 (81)      | 28 (82)      | 40 (91)          | 0.344   |
| PONV                 | 2 (4.8)      | 3 (8.8)      | 2 (4.5)          | 1.000   |

doi:10.1371/journal.pone.0133309.t004

were less invasive. A second explanation is that despite the beneficial effects of preoperative CHO and/or ORS have been reported, the effects when used prior to minor surgeries could be much less. Previously published studies have mostly included abdominal surgery, and there are no reports of preoperative CHO and/or ORS administration in minor surgeries. Thus, an assumption could be made that due to the minimally invasive nature of the surgeries included in the study, the patients recovered well independent of the preoperative administration of CHO and/or ORS.

Although the administration of either CHO or ORS was thought to restore circulatory volume and potentially result in a reduced reliance on vasopressor use during the surgery when compared to the control group, there was no significant difference among the treatment groups. However, there are reports that preoperative fasting does not induce significant hypovolemia, and that preoperative ORS does not affect the magnitude of hypotension [16–18], which was in accord with our current results. Likewise, as was previously mentioned, two thirds of the cases in the current study included patients undergoing the transperineal brachytherapy for the treatment of prostate cancer. Despite the minimal invasiveness of the procedure, immobilization with muscle relaxant and strong analgesia are required. Thus, the assumption was made that, blood pressure inevitably dropped, and the use of a vasopressor was required in all the groups.

In body temperature assessments, we were not able to achieve any positive results, but showed the propensity to maintain temperatures in the per-protocol analyses. Preoperative CHO loading has been shown to attenuate the development of hypothermia during general anaesthesia in rats [19]. However, in this study, no surgical procedures had been performed, which may not accurately reflect a clinical practice. In a clinical study that investigated the effects of preoperative CHO intake on thermoregulation, significant decreases in postoperative shivering were reported in the CHO group compared to the control group, but no differences were apparent in intraoperative temperatures [20]. Preoperative intake of CHO or ORS may have some effect on the prevention of intraoperative hypothermia, but the effects are probably too minor to cause any significant changes in temperature. In our study, there was only one case of postoperative shivering in the control group; thus, we cannot discuss whether preoperative administration of CHO had any effect on prevention of intraoperative hypothermia.

There are limitations to our study. First, there was imbalance in the type of surgeries performed, which led to a predominance of male patients, and elderly men in particular. Patient sex is an independent factor that influences post-surgical recovery responses, and prior reports have indicated that QoR tends to be better in men than in women [21]. Therefore, the QoR-40 score may be lower if the number of women included in the study is disproportionately high, and the results could be different. Moreover, whether the patient age has any influence in QoR is unknown, but the potential exists that results may be different in younger patients. Second, the patients were aware of the group to which they had been allocated. Thus, concerns existed that there may have been some psychological effects on QoR-40 when patients who wished to



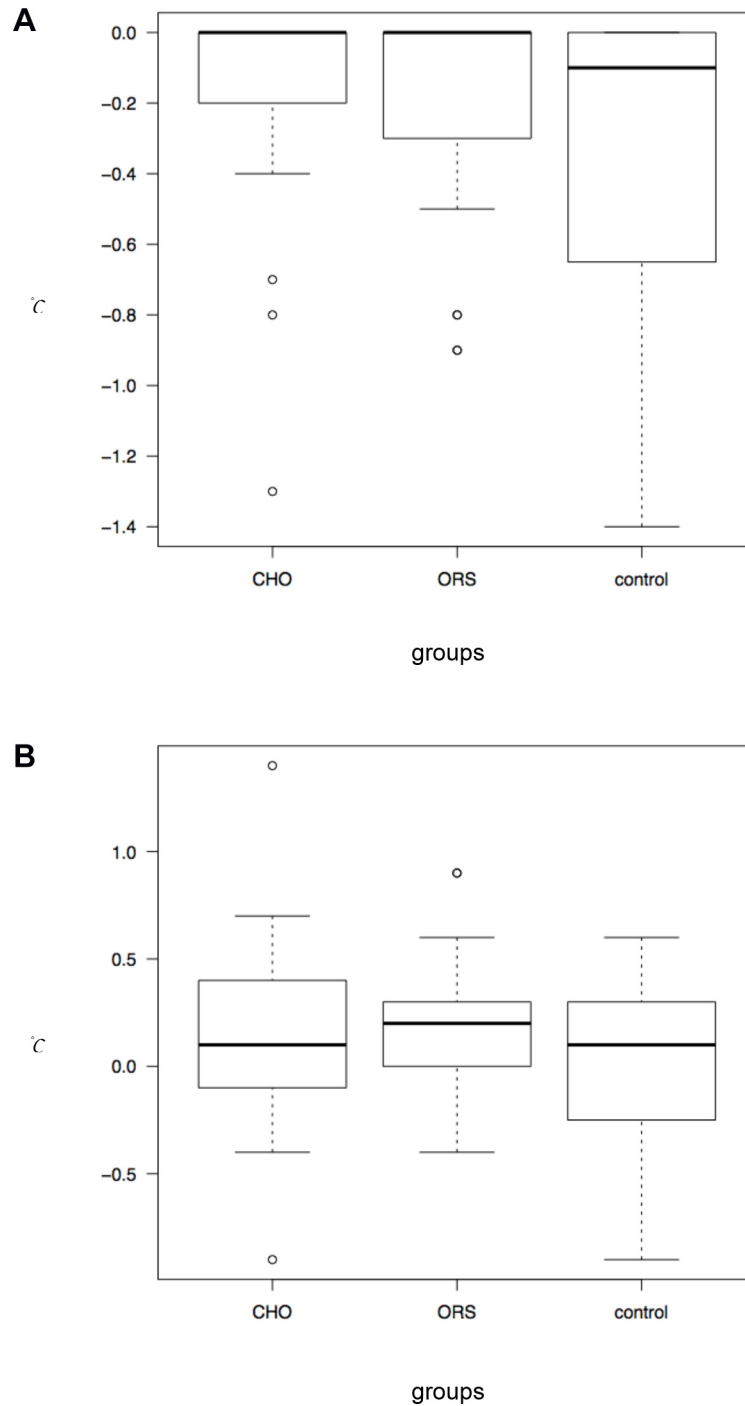

**Fig 3. A. Box plot of the maximum decrease of temperatures from the baseline.** No significant differences were detected among the groups, but the maximum decreases tended to be smaller in the CHO and ORS groups than in the control group. **B. Box plot of the final temperature changes at the end of surgery.** No significant differences were detected among the groups. No patients in either the CHO or ORS groups aspirated during any of the procedures.

doi:10.1371/journal.pone.0133309.g003

receive either CHO or ORS were allocated to the control group. However, there were no differences in each QoR-40 dimensions, including emotional state, which indicated that the actual

impact of our concerns was minimal. Third, there was no placebo group (i.e., preoperative clear fluid without CHO load) in our study, which would potentially make it difficult to interpret our results, especially if the results were positive. However, we considered that the conclusions derived from our negative results would not be affected by lack of a placebo group. This is because the effect of placebo fluid on QoR was assumed to be between that of the fasted group and the CHO/ORS groups, and we have shown that the effect of these groups on QoR were not different.

In conclusion, the preoperative administration of either CHO or ORS had little impact on improving the quality of recovery in current study, with the surgical procedures performed were less invasive, and the patient population was largely comprised of elderly men. Accordingly, further studies are needed to confirm if the results would differ for more invasive surgeries, or in women and younger patients.

## Supporting Information

### **S1 CONSORT Checklist. CONSORT Checklist.**

(DOC)

### **S1 Protocol. Protocol, original.**

(DOC)

### **S2 Protocol. Protocol, English version.**

(DOCX)

### **S1 Supporting Information. Application for the Ethics Committee, original.**

(DOC)

### **S2 Supporting Information. Application for the Ethics Committee, English version.**

(DOCX)

## Author Contributions

Conceived and designed the experiments: AA TG. Performed the experiments: AA. Analyzed the data: AA TM. Contributed reagents/materials/analysis tools: AA. Wrote the paper: AA TM TG.

## References

1. Braga M, Ljungqvist O, Soeters P, Fearon K, Weimann A, Bozzetti F. ESPEN Guidelines on Parenteral Nutrition: Surgery. *Clin Nutr* 2009; 28: 378–86. doi: [10.1016/j.clnu.2009.04.002](https://doi.org/10.1016/j.clnu.2009.04.002) PMID: [19464088](https://pubmed.ncbi.nlm.nih.gov/19464088/)
2. Li L, Wang Z, Ying X, Tian J, Sun T, Yi K, et al. Preoperative carbohydrate loading for elective surgery: a systematic review and meta-analysis. *Surg Today*, 2012; 42: 613–24. doi: [10.1007/s00595-012-0188-7](https://doi.org/10.1007/s00595-012-0188-7) PMID: [22581289](https://pubmed.ncbi.nlm.nih.gov/22581289/)
3. Bilku DK, Dennison AR, Hall TC, Metcalfe MS, Garcea G. Role of preoperative carbohydrate loading: a systematic review. *Ann R Coll Surg Engl* 2014; 96: 15–22. doi: [10.1308/003588414X13824511650614](https://doi.org/10.1308/003588414X13824511650614) PMID: [24417824](https://pubmed.ncbi.nlm.nih.gov/24417824/)
4. Henriksen MG, Hessov I, Dela F, Hansen HV, Haraldsted V, Rodt SA. Effects of preoperative oral carbohydrates and peptides on postoperative endocrine response, mobilization, nutrition and muscle function in abdominal surgery. *Acta Anaesthesiol Scand* 2003; 47: 191–9. PMID: [12631049](https://pubmed.ncbi.nlm.nih.gov/12631049/)
5. Noblett S, Watson DS, Huong H, Davison B, Hainsworth PJ, Horgan AF. Pre-operative oral carbohydrate loading in colorectal surgery: a randomized controlled trial. *Colorectal Dis* 2006; 8: 563–9. PMID: [16919107](https://pubmed.ncbi.nlm.nih.gov/16919107/)
6. Melis GC, van Leeuwen PA, von Blomberg-van der Flier BM, Goedhart-Hiddinga AC, Uitdehaag BM, Strack van Schijndel RJ, et al. A carbohydrate-rich beverage prior to surgery prevents surgery-induced immunodepression: a randomized, controlled, clinical trial. *JPEN J Parenter Enteral Nutr* 2006; 30: 21–6. PMID: [16387895](https://pubmed.ncbi.nlm.nih.gov/16387895/)

7. Hausel J, Nygren J, Lagerkranser M, Hellström PM, Hammarqvist F, Almström C, et al. A Carbohydrate-Rich Drink Reduces Preoperative Discomfort in Elective Surgery Patients. *Anesth Analg* 2001; 93: 1344–50 PMID: [11682427](#)
8. Taniguchi H, Sasaki T, Fujita H, Takamori M, Kawasaki R, Momiyama Y, et al. Preoperative fluid and electrolyte management with oral rehydration therapy. *J Anesth* 2009; 23: 222–9. doi: [10.1007/s00540-009-0743-6](#) PMID: [19444561](#)
9. Awad S, Varadhan KK, Ljungqvist O, Lobo DN. A meta-analysis of randomised controlled trials on preoperative oral carbohydrate treatment in elective surgery. *Clin Nutr* 2013; 32: 34–44. doi: [10.1016/j.clnu.2012.10.011](#) PMID: [23200124](#)
10. Khan S, Wilson T, Ahmed J, Owais A, MacFie J. Quality of life and patient satisfaction with enhanced recovery protocols. *Colorectal Dis* 2010; 12: 1175–82. doi: [10.1111/j.1463-1318.2009.01997.x](#) PMID: [19594603](#)
11. Tanaka Y, Wakita T, Fukuhara S, Nishiwada M, Inoue S, Kawaguchi M, et al. Validation of the Japanese version of the quality of recovery score QoR-40. *J Anesth* 2011; 25: 509–15. doi: [10.1007/s00540-011-1151-2](#) PMID: [21626452](#)
12. De Oliveira GS, Fitzgerald PC, Marcus RJ, Ahmad S, McCarthy RJ. Dose ranging study on the effect of preoperative dexamethasone on postoperative quality of recovery and opioid consumption after ambulatory gynaecological surgery. *Br J Anaesth* 2011; 107: 362–71. doi: [10.1093/bja/aer156](#) PMID: [21669954](#)
13. Myles PS, Weitkamp B, Jones K, Melick J, Hensen S. Validity and reliability of a postoperative quality of recovery score: the QoR-40. *Br J Anaesth* 2000; 84: 11–15. PMID: [10740540](#)
14. Kanda Y. Investigation of the freely available easy-to-use software 'EZR' for medical statistics. *Bone Marrow Transplant* 2013; 48: 452–8 doi: [10.1038/bmt.2012.244](#) PMID: [23208313](#)
15. Gornall BF, Myles PS, Smith CL, Burke JA, Leslie K, Pereira MJ, et al. Measurement of quality of recovery using the QoR-40: a quantitative systematic review. *Br J Anaesth* 2013; 25: 509–15
16. Muller L, Brière M, Bastide S, Roger C, Zoric L, Seni G, et al. Preoperative fasting does not affect haemodynamic status: a prospective, non-inferiority, echocardiography study. *Br J Anaesth* 2014; 112: 835–41. doi: [10.1093/bja/aet478](#) PMID: [24496782](#)
17. Jacob M, Chappell D, Conzen P, Finsterer U, Rehm M. Blood volume is normal after pre-operative overnight fasting. *Acta Anaesthesiol Scand* 2008; 52: 522–9. doi: [10.1111/j.1399-6576.2008.01587.x](#) PMID: [18339157](#)
18. Iwayama S, Tatara T, Osugi T, Hirose M. Preoperative oral rehydration solution intake volume does not affect relative change of mean arterial blood pressure and crystalloid redistribution during general anesthesia in low-risk patients: an observational cohort study. *J Anesth* 2014; 28: 132–5. doi: [10.1007/s00540-013-1670-0](#) PMID: [23828452](#)
19. Yatabe T, Kawano T, Yamashita K, Yokoyama M. Preoperative carbohydrate-rich beverage reduces hypothermia during general anesthesia in rats. *J Anesth* 2011; 25: 558–62. doi: [10.1007/s00540-011-1170-z](#) PMID: [21607766](#)
20. Ozer AB, Demirel I, Kavak BS, Gurbuz O, Unlu S, Bayar MK, et al. Effects of preoperative oral carbohydrate solution intake on thermoregulation. *Med Sci Monit* 2013; 19: 625–30. doi: [10.12659/MSM.883991](#) PMID: [23900128](#)
21. Buchanan FF, Myles PS, Cicuttini F. Effect of patient sex on general anaesthesia and recovery. *Br J Anaesth* 2011; 106: 832–9. doi: [10.1093/bja/aer094](#) PMID: [21558068](#)
